# Supplementary material for: Validation of the Refugee Health Screener-15 for the assessment of perinatal depression among Karen and Burmese women on the Thai-Myanmar border
Source: PubMed Central journal article supplement (PMC5962314; doi:10.1371/journal.pone.0197403), 2018-05-21
Supplement: pone.0197403.s006.pdf [file pone.0197403.s006.pdf]

**MAHIDOL-OXFORD TROPICAL MEDICINE  
RESEARCH UNIT**

**Shoklo Malaria Research Unit**

68/30 Baan Tung Road, 63110 Mae Sot Thailand

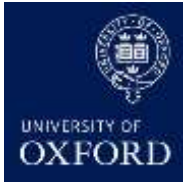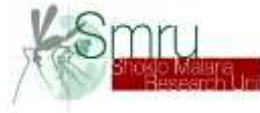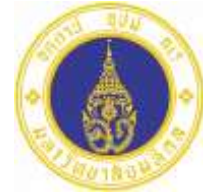

☎: +66 5554 5021

Fax: +66 5554 5020

E-mail: [rose@shoklo-unit.com](mailto:rose@shoklo-unit.com)

21 March 2018

To whom it may concern:

I hereby grant permission for the open-access journal PLOS ONE to publish the map of SMRU clinic sites, including migrant and refugee sites, labelled as Figure 1 in the accompanying manuscript, under the Creative Commons Attribution License (CCAL) CC BY 4.0 (<http://creativecommons.org/licenses/by/4.0/>). I understand that this license allows unrestricted use and distribution, even commercially, by third parties.

If you need any further information please do not hesitate to contact me.

Sincerely

A handwritten signature in black ink, appearing to read "Rose McGready".

Dr Rose McGready

Professor of Tropical Maternal and Child Health

Deputy Director SMRU
